# Supplementary material for: Structural basis for Fullerene geometry in a human endogenous retrovirus capsid
Source: PubMed Central journal article supplement (PMC6925226; doi:10.1038/s41467-019-13786-y), 2019-12-20
Supplement: 41467_2019_13786_MOESM2_ESM.pdf [file 41467_2019_13786_MOESM2_ESM.pdf]

## Description of Additional Supplementary Files

**File name:** Supplementary Movie 1

**Description:** Hexamer to pentamer transformation. Movie comparing the structure of the D6 polar hexamer and the T=1 pentamer. The movie highlights the changes in monomer packing when a different number of CA monomers are accommodated in the ring. NTDs are coloured salmon, CTDs are coloured cyan. Morph was created using Chimera.
